# Supplementary material for: Genetic Structure of Cultivated Varieties of Radicchio (Cichorium intybus L.): A Comparison between F1 Hybrids and Synthetics
Source: PubMed Central journal article supplement (PMC6681312; doi:10.3390/plants8070213), 2019-07-10
Supplement: plants-08-00213-s001.pdf [file plants-08-00213-s001.pdf]

|      |            |            |            |            |            |            |            |            |
|------|------------|------------|------------|------------|------------|------------|------------|------------|
| OP-1 | 84.1 ± 2.6 |            |            |            |            |            |            |            |
| OP-2 | 78.5 ± 2.4 | 86.1 ± 7.1 |            |            |            |            |            |            |
| F1-A | 78.8 ± 2.8 | 84.4 ± 2.0 | 95.0 ± 1.8 |            |            |            |            |            |
| F1-B | 76.4 ± 2.2 | 83.7 ± 1.7 | 87.2 ± 1.6 | 95.1 ± 1.5 |            |            |            |            |
| F1-C | 78.6 ± 2.5 | 78.5 ± 1.8 | 79.5 ± 1.5 | 77.4 ± 1.6 | 95.6 ± 1.9 |            |            |            |
| F1-D | 76.9 ± 2.4 | 75.6 ± 2.2 | 76.8 ± 1.4 | 76.4 ± 1.5 | 82.5 ± 2.2 | 93.1 ± 2.3 |            |            |
| F2-C | 78.8 ± 2.4 | 78.8 ± 2.3 | 80.3 ± 1.8 | 78.1 ± 1.7 | 90.2 ± 2.5 | 81.2 ± 2.6 | 88.9 ± 2.5 |            |
| F2-D | 77.7 ± 2.3 | 76.3 ± 2.1 | 77.4 ± 1.9 | 76.9 ± 1.6 | 81.4 ± 1.9 | 90.3 ± 2.5 | 80.2 ± 2.6 | 91.1 ± 2.3 |
|      | OP-1       | OP-2       | F1-A       | F1-B       | F1-C       | F1-D       | F2-C       | F2-D       |

**Figure S1.** Pairwise genetic similarity matrix of the eight analysed populations (in percentage) based on Rohlf's genetic similarity coefficient. The high genetic similarity values are labelled in red and the low values are labelled in green. Intermediate values are coloured in scale.

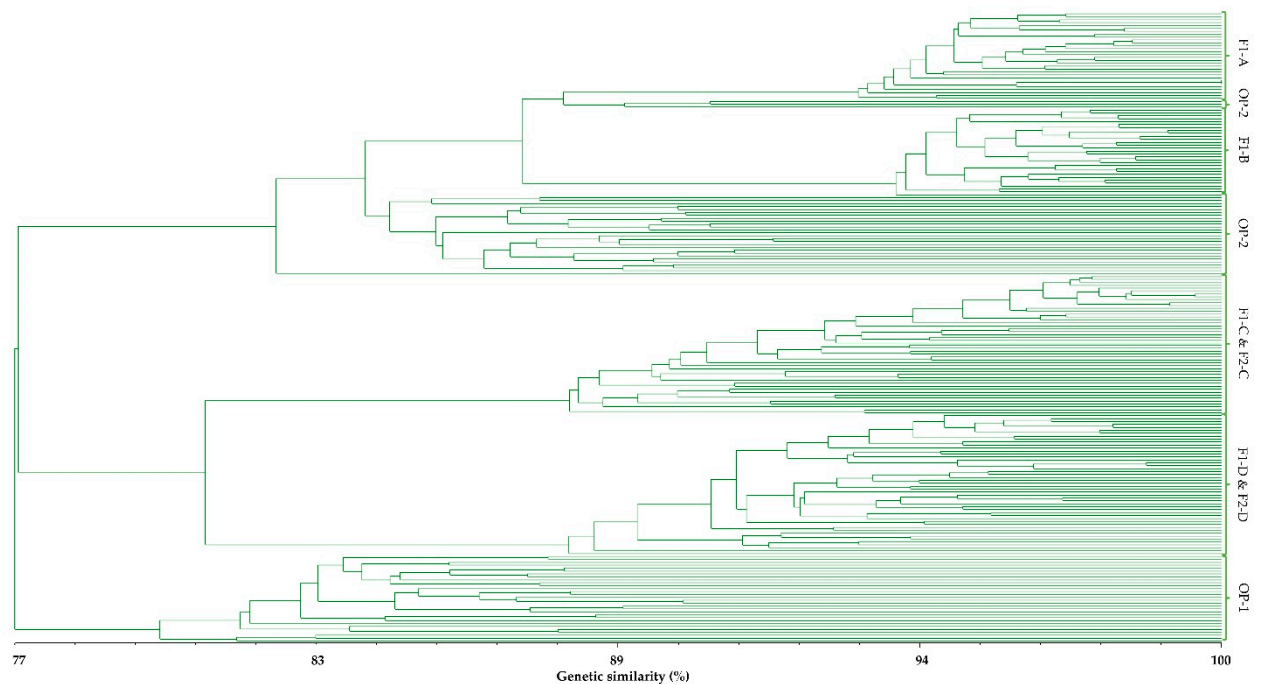

**Figure S2.** UPGMA tree of the 216 samples analysed. The dendrogram was computed using the symmetrical genetic similarity matrix of all pair-wise comparisons among samples.

**Table S1.** Number of alleles and PIC found across populations and loci for each of the F1 hybrids, F2 progenies and OP synthetics. In particular, statistics refer to the mean number of alleles (Na) and number of effective alleles (Ne) for each locus, population and type of population and for the whole population. Moreover, PIC values for each locus of each population are presented.

| ID<br>Locus | Mean Na/Locus | Mean Ne/Locus | PIC | OP-1 |     | OP-2 |     | F1-A |     | F1-B |     | F1-C |     | F1-D |     | F2-C |     | F2-D |     |
|-------------|---------------|---------------|-----|------|-----|------|-----|------|-----|------|-----|------|-----|------|-----|------|-----|------|-----|
|             |               |               |     | Na   | Ne  | Na   | Ne  | Na   | Ne  | Na   | Ne  | Na   | Ne  | Na   | Ne  | Na   | Ne  | Na   | Ne  |
| M 2.4       | 3.1           | 2.2           | 0.7 | 5.0  | 3.1 | 8.0  | 5.1 | 2.0  | 1.0 | 2.0  | 2.0 | 2.0  | 1.1 | 2.0  | 2.0 | 4.0  | 1.7 | 2.0  | 2.0 |
| M 4.10b     | 2.4           | 1.8           | 0.6 | 5.0  | 3.2 | 3.0  | 1.3 | 1.0  | 1.0 | 1.0  | 1.0 | 3.0  | 1.6 | 4.0  | 2.5 | 3.0  | 2.5 | 2.0  | 1.6 |
| M 3.7       | 1.1           | 1.1           | 0.1 | 1.0  | 1.0 | 1.0  | 1.0 | 2.0  | 1.1 | 1.0  | 1.0 | 3.0  | 1.4 | 1.0  | 1.0 | 2.0  | 1.3 | 1.0  | 1.0 |
| M 8.22      | 1.0           | 1.1           | 0.0 | 2.0  | 1.4 | 1.0  | 1.0 | 1.0  | 1.0 | 1.0  | 1.0 | 1.0  | 1.0 | 1.0  | 1.0 | 1.0  | 1.0 | 1.0  | 1.0 |
| M 2.5       | 2.6           | 2.1           | 0.8 | 4.0  | 2.9 | 5.0  | 3.0 | 2.0  | 2.0 | 2.0  | 1.9 | 1.0  | 1.0 | 2.0  | 2.0 | 4.0  | 2.1 | 2.0  | 2.0 |
| M 5.15      | 2.4           | 1.5           | 0.3 | 5.0  | 3.0 | 3.0  | 1.2 | 1.0  | 1.0 | 1.0  | 1.0 | 1.0  | 1.0 | 3.0  | 1.7 | 5.0  | 2.3 | 1.0  | 1.0 |
| M 4.11a     | 3.1           | 2.1           | 0.7 | 4.0  | 1.8 | 6.0  | 1.7 | 2.0  | 1.7 | 2.0  | 1.7 | 3.0  | 2.6 | 3.0  | 2.3 | 4.0  | 2.0 | 4.0  | 2.6 |
| M 1.1       | 3.9           | 2.3           | 0.8 | 9.0  | 3.4 | 7.0  | 3.1 | 2.0  | 1.8 | 1.0  | 1.0 | 2.0  | 2.0 | 3.0  | 2.1 | 4.0  | 2.8 | 3.0  | 2.1 |
| M 9.26      | 3.0           | 2.0           | 0.6 | 6.0  | 2.3 | 3.0  | 1.9 | 2.0  | 1.0 | 2.0  | 1.9 | 3.0  | 2.1 | 4.0  | 3.2 | 4.0  | 2.3 | 3.0  | 1.5 |
| M 4.10a     | 1.6           | 1.7           | 0.5 | 2.0  | 1.7 | 2.0  | 1.4 | 1.0  | 1.0 | 2.0  | 1.9 | 2.0  | 2.0 | 2.0  | 1.9 | 2.0  | 2.0 | 2.0  | 1.9 |
| M 4.11b     | 2.0           | 2.1           | 0.5 | 3.0  | 2.6 | 3.0  | 2.1 | 2.0  | 2.0 | 2.0  | 2.0 | 2.0  | 2.0 | 2.0  | 2.0 | 2.0  | 2.0 | 2.0  | 2.0 |
| M 5.14      | 1.1           | 1.1           | 0.1 | 2.0  | 1.8 | 1.0  | 1.0 | 1.0  | 1.0 | 1.0  | 1.0 | 1.0  | 1.0 | 1.0  | 1.0 | 2.0  | 1.0 | 1.0  | 1.0 |
| M 5.13      | 2.1           | 2.1           | 0.7 | 4.0  | 3.0 | 2.0  | 2.0 | 2.0  | 2.0 | 1.0  | 1.0 | 2.0  | 2.0 | 2.0  | 2.0 | 4.0  | 2.9 | 2.0  | 2.0 |
| M 6.16      | 2.9           | 1.8           | 0.6 | 6.0  | 2.6 | 4.0  | 2.4 | 2.0  | 1.2 | 3.0  | 1.7 | 2.0  | 2.0 | 2.0  | 1.2 | 4.0  | 2.2 | 2.0  | 1.4 |
| M 7.19      | 2.4           | 2.0           | 0.6 | 2.0  | 1.9 | 5.0  | 2.5 | 3.0  | 1.7 | 1.0  | 1.0 | 3.0  | 2.5 | 2.0  | 2.0 | 4.0  | 2.2 | 2.0  | 2.0 |
| M 3.8       | 3.5           | 2.1           | 0.7 | 4.0  | 1.6 | 8.0  | 4.3 | 2.0  | 1.1 | 2.0  | 1.0 | 1.0  | 1.0 | 4.0  | 3.3 | 4.0  | 1.3 | 4.0  | 3.3 |
| M 4.12      | 3.9           | 2.5           | 0.8 | 7.0  | 4.1 | 9.0  | 6.1 | 3.0  | 1.3 | 4.0  | 2.7 | 1.0  | 1.0 | 2.0  | 1.3 | 2.0  | 1.8 | 4.0  | 1.4 |
| M 6.17      | 2.9           | 2.3           | 0.7 | 2.0  | 2.0 | 8.0  | 4.0 | 2.0  | 1.1 | 4.0  | 3.0 | 4.0  | 3.3 | 2.0  | 1.1 | 2.0  | 1.7 | 3.0  | 2.5 |
| M 1.2       | 3.1           | 2.1           | 0.8 | 6.0  | 2.5 | 6.0  | 3.1 | 3.0  | 1.6 | 2.0  | 1.2 | 3.0  | 2.1 | 2.0  | 1.9 | 4.0  | 2.6 | 2.0  | 1.5 |
| M 1.3       | 3.1           | 2.2           | 0.6 | 4.0  | 1.7 | 7.0  | 4.1 | 4.0  | 2.1 | 2.0  | 2.0 | 2.0  | 2.0 | 2.0  | 2.0 | 4.0  | 2.2 | 2.0  | 2.0 |
| M 9.25      | 2.5           | 2.1           | 0.7 | 4.0  | 2.4 | 3.0  | 2.1 | 4.0  | 2.7 | 3.0  | 1.7 | 3.0  | 2.1 | 2.0  | 1.5 | 2.0  | 2.0 | 2.0  | 2.0 |
| M 8.23      | 2.6           | 1.8           | 0.7 | 3.0  | 2.7 | 3.0  | 1.5 | 4.0  | 1.6 | 2.0  | 2.0 | 2.0  | 1.1 | 3.0  | 2.1 | 3.0  | 1.3 | 3.0  | 1.9 |
| M 2.6       | 3.9           | 3.0           | 0.8 | 10.0 | 5.2 | 7.0  | 4.8 | 3.0  | 2.4 | 2.0  | 2.0 | 3.0  | 2.3 | 3.0  | 2.1 | 4.0  | 2.9 | 2.0  | 2.0 |
| M 7.21      | 1.9           | 1.7           | 0.5 | 1.0  | 1.0 | 2.0  | 2.0 | 2.0  | 1.8 | 2.0  | 2.0 | 2.0  | 1.7 | 2.0  | 2.0 | 3.0  | 1.2 | 3.0  | 2.1 |
| M 9.27      | 3.4           | 2.4           | 0.8 | 7.0  | 4.2 | 5.0  | 2.6 | 4.0  | 3.9 | 3.0  | 2.3 | 3.0  | 1.5 | 2.0  | 1.5 | 4.0  | 1.3 | 2.0  | 2.0 |
| M 7.2       | 2.5           | 2.2           | 0.7 | 6.0  | 4.3 | 1.0  | 1.0 | 2.0  | 1.9 | 3.0  | 2.1 | 2.0  | 2.0 | 3.0  | 2.1 | 3.0  | 2.1 | 2.0  | 1.9 |

---

|                  |     |     |     |     |     |     |     |     |     |     |     |     |     |     |     |     |     |     |     |
|------------------|-----|-----|-----|-----|-----|-----|-----|-----|-----|-----|-----|-----|-----|-----|-----|-----|-----|-----|-----|
| M 8.24           | 3.3 | 2.5 | 0.8 | 6.0 | 3.9 | 4.0 | 2.0 | 2.0 | 1.3 | 3.0 | 2.6 | 4.0 | 2.2 | 4.0 | 3.1 | 3.0 | 2.4 | 4.0 | 2.1 |
| M 6.18           | 3.1 | 2.2 | 0.7 | 6.0 | 4.6 | 4.0 | 1.4 | 1.0 | 1.0 | 3.0 | 2.6 | 2.0 | 1.1 | 4.0 | 3.1 | 4.0 | 1.5 | 3.0 | 2.1 |
| M 3.9            | 3.5 | 2.6 | 0.8 | 8.0 | 4.0 | 7.0 | 3.2 | 2.0 | 2.0 | 2.0 | 2.0 | 3.0 | 2.5 | 3.0 | 2.5 | 3.0 | 2.7 | 3.0 | 2.1 |
| <b>Mean/ Pop</b> | 2.7 | 2.0 | 0.6 | 4.6 | 2.8 | 4.4 | 2.5 | 2.2 | 1.6 | 2.1 | 1.7 | 2.3 | 1.8 | 2.5 | 2.0 | 3.2 | 2.0 | 2.4 | 1.9 |

---

**Table S2.** Frequency of private alleles and alleles size for each locus of the populations with frequencies  $\geq 15\%$  and population specific.

| <b>ID</b> | <b>Locus</b> | <b>Allele Size (bp)</b> | <b>Freq</b> |
|-----------|--------------|-------------------------|-------------|
| OP-1      | M8.22        | 204                     | 16.1%       |
|           | M4.11b       | 196                     | 16.7%       |
|           | M6.17        | 254                     | 50.0%       |
|           | M1.3         | 256                     | 16.7%       |
|           | M9.27        | 278                     | 28.3%       |
|           | M 7.2        | 184                     | 22.9%       |
|           | M 6.18       | 173                     | 19.0%       |
| OP-2      | M2.4         | 172                     | 15.0%       |
|           | M3.8         | 171                     | 20.0%       |
| F1-B      | M2.4         | 139                     | 50.0%       |
|           | M1.1         | 247                     | 40.0%       |
|           | M4.12        | 240                     | 15.0%       |
|           | M6.17        | 274                     | 15.0%       |
| F1-C      | M6.17        | 298                     | 25.0%       |

**Table S3.** The sizes and the frequencies of the most frequent alleles for each locus of all the varieties and F2 progenies are reported.

| ID            | OP-1                  |               | OP-2                  |                 | F1-A        |        | F1-B        |        | F1-C        |        | F1-D        |        | F2-C        |        | F2-D        |        |
|---------------|-----------------------|---------------|-----------------------|-----------------|-------------|--------|-------------|--------|-------------|--------|-------------|--------|-------------|--------|-------------|--------|
| LOCUS         | Allele size           | Freq          | Allele size           | Freq            | Allele size | Freq   | Allele size | Freq   | Allele size | Freq   | Allele size | Freq   | Allele size | Freq   | Allele size | Freq   |
| <b>M2.4</b>   | 166                   | 22.0%         | 160 - 164 - 174       | < 5.0 %         | 170         | 98.0%  | 139         | 50.0%  | 170         | 97.0%  | 166         | 47.0%  | 170         | 75.0%  | 166         | 58.0%  |
|               | 168                   | 43.0%         | 162 - 170 - 172       | < 16.0 %        |             |        |             |        |             |        | 170         | 53.0%  | 164         | 12.0%  | 170         | 42.0%  |
|               | 170                   | 30.0%         | 166                   | 20.0%           |             |        |             |        |             |        |             |        | 168         | 10.0%  |             |        |
|               | 158 - 164             | < 3.0 %       | 168                   | 32.0%           | 168         | 2.0%   | 166         | 50.0%  | 166         | 3.0%   |             |        | 166         | 3.0%   |             |        |
| <b>M4.10b</b> | 253 - 257             | > 30.0 %      |                       |                 |             |        |             |        | 271         | 78.0%  | 255         | 50.0%  | 271         | 48.0%  |             |        |
|               | 255                   | 12.0%         | 255                   | 86.5%           | 255         | 100.0% | 255         | 100.0% | 255         | 19.0%  | 271         | 38.0%  | 255         | 40.0%  | 255         | 75.0%  |
|               | 259                   | 4.0%          | 257                   | 9.6%            |             |        |             |        | 253         | 3.0%   | 252         | 6.0%   | 252         | 13.0%  | 271         | 25.0%  |
|               | 271                   | 8.0%          | 253                   | 3.8%            |             |        |             |        |             |        | 259         | 6.0%   |             |        |             |        |
| <b>M3.7</b>   | 162                   | 100.0%        | 162                   | 100.0%          | 162         | 93.0%  |             |        | 162         | 83.0%  |             |        | 162         | 87.0%  |             |        |
|               |                       |               |                       |                 | 164         | 7.0%   | 162         | 100.0% | 164         | 11.0%  | 162         | 100.0% | 164         | 13.0%  | 162         | 100.0% |
| <b>M8.22</b>  | 201                   | 84.0%         | 201                   | 100.0%          | 201         | 100.0% | 201         | 100.0% | 201         | 100.0% | 201         | 100.0% | 201         | 100.0% | 201         | 100.0% |
|               | 204                   | 16.0%         |                       |                 |             |        |             |        |             |        |             |        |             |        |             |        |
| <b>M2.5</b>   | 215                   | 40.0%         | 215                   | 47.0%           | 215         | 57.0%  | 215         | 62.0%  |             |        | 219         | 47.0%  | 225         | 67.0%  | 219         | 47.0%  |
|               | 219                   | 42.0%         | 219 - 225             | 10.0%           | 221         | 43.0%  | 221         | 38.0%  |             |        | 221         | 53.0%  | 221         | 15.0%  | 221         | 53.0%  |
|               | 225                   | 10.0%         | 221                   | 30.0%           |             |        |             |        | 225         | 100.0% |             |        | 215         | 12.0%  | 215         | 2.0%   |
|               | 221                   | 8.0%          | 223                   | 3.0%            |             |        |             |        |             |        |             |        | 219         | 7.0%   |             |        |
| <b>M5.15</b>  | 257 - 271             | 40.0%         | 271                   | 91.7%           |             |        |             |        |             |        | 255         | 22.0%  | 271         | 60.0%  |             |        |
|               | 272                   | 6.7%          | 272                   | 6.7%            |             |        |             |        |             |        | 271         | 72.0%  | 265         | 24.0%  |             |        |
|               | 259                   | 10.0%         | 269                   | 1.7%            | 271         | 100.0% | 271         | 100.0% | 271         | 100.0% | 257         | 6.0%   | 255         | 12.0%  | 271         | 100.0% |
|               | 265                   | 3.3%          |                       |                 |             |        |             |        |             |        |             |        | 261         | 2.0%   |             |        |
| <b>M4.11a</b> | 187                   | 58.3%         | 187                   | 66.7%           |             |        |             |        | 191         | 61.0%  | 185         | 39.0%  | 191         | 57.0%  | 185         | 79.0%  |
|               | 185                   | 30.0%         | 185                   | 28.3%           | 185         | 98.0%  | 185         | 60.0%  | 185         | 33.0%  | 191         | 36.0%  | 185         | 32.0%  | 183         | 16.0%  |
|               | 172 - 183             | 3.3%          | 183                   | 5.0%            | 187         | 2.0%   | 187         | 40.0%  | 187         | 6.0%   | 187         | 17.0%  | 187         | 7.0%   | 187         | 5.0%   |
|               | 177                   | 1.7%          |                       |                 |             |        |             |        |             |        | 183         | 8.0%   | 183         | 5.0%   |             |        |
| <b>M1.1</b>   | 253                   | 70.0%         | 253                   | 16.0%           | 255         | 100.0% | 247         | 40.0%  | 253         | 50.0%  | 253         | 41.0%  | 253         | 57.0%  | 253         | 41.0%  |
|               | 255                   | 30.0%         | 255                   | 84.0%           |             |        | 255         | 60.0%  | 255         | 50.0%  | 255         | 59.0%  | 255         | 43.0%  | 255         | 59.0%  |
| <b>M9.26</b>  | 130                   | 73.0%         | 130                   | 75.0%           | 140         | 70.0%  | 140         | 72.0%  | 140         | 50.0%  | 130         | 33.0%  | 140         | 60.0%  | 140         | 55.0%  |
|               | 132                   | 17.0%         | 162                   | 13.0%           | 162         | 30.0%  | 162         | 28.0%  | 130         | 31.0%  | 140         | 56.0%  | 130         | 37.0%  | 130         | 24.0%  |
|               | 128 - 134             | < 7.0 %       | 134 - 140 - 150 - 156 | < 5.0 %         |             |        |             |        | 128         | 19.0%  | 132         | 11.0%  | 128 - 134   | 2.0%   | 132 - 143   | 10.0%  |
| <b>M4.10a</b> | 286                   | 46.7%         | 247                   | 51.7%           | 247         | 69.0%  |             |        | 249         | 50.0%  | 261         | 47.0%  | 249 - 265   | 37.0%  | 261         | 50.0%  |
|               | 247 - 249 - 265 - 272 | 7.0 % - 5.0 % | 265                   | 15.0%           | 265         | 31.0%  |             |        | 265         | 50.0%  | 265         | 50.0%  | 286         | 12.0%  | 265         | 48.0%  |
|               | 261 - 267 - 273 - 284 | < 5.0 %       | 267 - 273             | 10.0 % - 11.0 % |             |        | 247         | 100.0% |             |        | 267         | 3.0%   | 247         | 8.0%   | 270         | 2.0%   |
|               |                       |               | 249 - 255 - 269       | < 0.08          |             |        |             |        |             |        |             |        |             |        |             |        |
| <b>M4.11b</b> | 187                   | 58.0%         | 187                   | 67.0%           | 199         | 48.0%  | 199         | 50.0%  | 199         | 50.0%  | 199         | 50.0%  | 199         | 50.0%  | 199         | 50.0%  |
|               | 185                   | 30.0%         | 185                   | 28.0%           |             |        | 203         | 50.0%  |             |        |             |        |             |        |             |        |
|               | 172 - 183             | 3.0%          | 183                   | 5.0%            | 203         | 52.0%  |             |        | 203         | 50.0%  | 203         | 50.0%  | 203         | 50.0%  | 203         | 50.0%  |
|               | 177                   | 17.0%         |                       |                 |             |        |             |        |             |        |             |        |             |        |             |        |
| <b>M5.14</b>  | 217                   | 30.0%         | 219                   | 100.0%          | 219         | 100.0% | 219         | 100.0% | 219         | 100.0% | 219         | 100.0% | 219         | 98.0%  | 219         | 100.0% |
|               | 219                   | 70.0%         |                       |                 |             |        |             |        |             |        |             |        | 217         | 2.0%   |             |        |
| <b>M5.13</b>  | 243                   | 40.0%         |                       |                 | 243         | 55.0%  | 243         | 100.0% | 245         | 50.0%  | 245         | 53.0%  | 245         | 43.0%  | 245         | 53.0%  |

|              |                             |                 |                       |                 |     |       |     |        |       |        |       |       |           |       |           |       |
|--------------|-----------------------------|-----------------|-----------------------|-----------------|-----|-------|-----|--------|-------|--------|-------|-------|-----------|-------|-----------|-------|
|              | 245                         | 40.0%           | 245                   | 57.0%           | 245 | 45.0% |     | 247    | 50.0% | 247    | 47.0% | 247   | 31.0%     | 247   | 47.0%     |       |
|              | 247                         | 20.0%           | 243                   | 43.0%           |     |       |     |        |       |        |       | 243   | 24.0%     | 241   | 2.0%      |       |
|              |                             |                 |                       |                 |     |       |     |        |       |        |       | 241   | 2.0%      |       |           |       |
| <b>M6.16</b> | 238                         | 60.0%           | 268                   | 60.0%           | 268 | 75.0% | 268 | 75.0%  | 238   | 53.0%  | 238   | 91.0% | 238       | 57.0% | 238       | 81.0% |
|              | 246                         | 30.0%           | 266                   | 30.0%           | 270 | 18.0% | 265 | 20.0%  | 268   | 47.0%  | 268   | 9.0%  | 268       | 31.0% | 268       | 19.0% |
|              | 268 - 270                   | 10.0%           | 238 - 270             | 10.0%           | 265 | 7.0%  | 244 | 5.0%   |       |        |       |       | 228 - 248 | 6.0%  |           |       |
| <b>M7.19</b> | 195                         | 60.0%           | 195                   | 47.0%           | 195 | 71.0% |     |        | 195   | 53.0%  | 195   | 47.0% | 195       | 50.0% | 195       | 52.0% |
|              | 203                         | 40.0%           | 199                   | 7.0%            | 203 | 28.0% | 195 | 100.0% | 203   | 33.0%  | 199   | 53.0% | 203       | 45.0% | 199       | 47.0% |
|              |                             |                 | 203                   | 42.0%           | 193 | 2.0%  |     |        | 201   | 14.0%  |       |       | 201       | 3.0%  | 197       | 2.0%  |
|              |                             |                 |                       |                 |     |       |     |        |       |        |       | 197   | 2.0%      |       |           |       |
| <b>M3.8</b>  | 169                         | 20.0%           | 178                   | 40.0%           |     |       | 169 | 98.0%  |       |        | 181   | 36.0% | 181       | 88.0% | 181       | 34.0% |
|              | 181                         | 80.0%           | 171                   | 20.0%           | 169 | 93.0% | 189 | 2.0%   |       |        | 185   | 36.0% | 187       | 5.0%  | 185       | 34.0% |
|              |                             |                 | 169 - 181 - 183 - 189 | < 20.0 %        | 189 | 7.0%  |     |        | 181   | 100.0% | 183   | 19.0% | 183       | 5.0%  | 178       | 24.0% |
|              |                             |                 |                       |                 |     |       |     |        |       | 178    | 8.0%  |       |           | 183   | 7.0%      |       |
| <b>M4.12</b> | 224                         | 40.0%           | 226                   | 30.0%           | 226 | 87.0% | 234 | 52.0%  |       |        | 224   | 86.0% | 228       | 68.0% | 224       | 84.0% |
|              | 226                         | 30.0%           | 232 - 234             | > 10.0 %        | 228 | 12.0% | 226 | 27.0%  |       |        | 216   | 14.0% | 226       | 32.0% | 216       | 9.0%  |
|              | 220                         | 20.0%           | 220 - 224 - 228 - 230 | < 10.0 %        | 224 | 2.0%  | 238 | 15.0%  | 228   | 100.0% |       |       |           |       | 219 - 225 | 4.0%  |
|              | 214 - 222                   | 10.0%           |                       |                 |     |       | 222 | 7.0%   |       |        |       |       |           |       |           |       |
| <b>M6.17</b> |                             |                 | 264                   | 38.0%           |     |       | 266 | 50.0%  | 298   | 25.0%  | 264   | 94.0% |           |       | 264       | 44.0% |
|              | 254                         | 50.0%           | 266                   | 12.0%           | 264 | 98.0% | 288 | 18.0%  | 304   | 44.0%  |       |       | 264       | 69.0% | 304       | 44.0% |
|              | 264                         | 50.0%           | 284                   | 8.0%            | 284 | 3.0%  | 274 | 15.0%  | 264   | 19.0%  |       |       | 304       | 31.0% | 284       | 13.0% |
|              |                             |                 |                       |                 |     |       | 284 | 18.0%  | 296   | 13.0%  | 304   | 6.0%  |           |       |           |       |
| <b>M1.2</b>  | 201                         | 50.0%           | 201                   | 7.0%            | 210 | 75.0% |     |        | 201   | 56.0%  | 195   | 36.0% | 213       | 50.0% | 201       | 80.0% |
|              | 206                         | 10.0%           | 206                   | 21.0%           | 206 | 23.0% | 210 | 91.0%  | 213   | 42.0%  | 201   | 64.0% | 201       | 35.0% | 195       | 20.0% |
|              | 213                         | 40.0%           | 211                   | 48.0%           | 215 | 2.0%  |     |        | 210   | 3.0%   |       |       | 206       | 10.0% |           |       |
|              |                             |                 | 213                   | 19.0%           |     |       |     |        |       |        |       |       | 199       | 5.0%  |           |       |
| <b>M1.3</b>  | 244                         | 75.0%           | 250                   | 31.0%           | 244 | 63.0% | 244 | 55.0%  | 244   | 50.0%  | 242   | 53.0% | 244       | 58.0% | 242       | 52.0% |
|              | 250                         | 7.0%            | 232                   | 22.0%           | 232 | 25.0% | 250 | 45.0%  | 250   | 50.0%  | 244   | 47.0% | 250       | 35.0% | 244       | 48.0% |
|              | 252                         | 2.0%            | 244                   | 29.0%           | 227 | 4.0%  |     |        |       |        |       |       | 248       | 2.0%  |           |       |
|              | 256                         | 17.0%           | 246                   | 10.0%           |     |       |     |        |       |        |       |       | 242       | 5.0%  |           |       |
|              |                             | 242 - 248 - 252 | < 3.0 %               |                 |     |       |     |        |       |        |       |       |           |       |           |       |
| <b>M9.25</b> | 177                         | 57.0%           | 175                   | 3.0%            | 177 | 34.0% | 177 | 73.0%  | 169   | 47.0%  | 175   | 22.0% | 169       | 50.0% | 175       | 53.0% |
|              | 195                         | 27.0%           | 177                   | 48.0%           | 195 | 47.0% | 183 | 25.0%  | 183   | 50.0%  | 177   | 78.0% | 183       | 50.0% | 177       | 47.0% |
|              | 199                         | 13.0%           | 183                   | 48.0%           | 183 | 17.0% | 193 | 2.0%   | 177   | 3.0%   |       |       |           |       |           |       |
|              | 183                         | 3.0%            |                       |                 | 187 | 2.0%  |     |        |       |        |       |       |           |       |           |       |
| <b>M8.23</b> | 231                         | 50.0%           | 221                   | 81.0%           | 221 | 78.0% | 221 | 50.0%  | 229   | 97.0%  | 229   | 53.0% | 229       | 87.0% | 229       | 62.0% |
|              | 229                         | 27.0%           | 231                   | 14.0%           | 223 | 14.0% | 229 | 50.0%  | 231   | 3.0%   | 247   | 44.0% | 231       | 13.0% | 247       | 36.0% |
|              | 221                         | 23.0%           | 229                   | 5.0%            | 229 | 5.0%  |     |        |       |        | 243   | 3.0%  |           |       | 243       | 2.0%  |
|              |                             |                 |                       |                 | 243 | 3.0%  |     |        |       |        |       |       |           |       |           |       |
| <b>M2.6</b>  | 187                         | 35.0%           | 193                   | 33.0%           | 193 | 50.0% | 193 | 50.0%  | 193   | 44.0%  | 197   | 53.0% | 207       | 42.0% | 201       | 57.0% |
|              | 211                         | 13.0%           | 197 - 205             | 17.0 % - 18.0 % | 187 | 40.0% | 205 | 50.0%  | 197   | 47.0%  | 201   | 44.0% | 197       | 33.0% | 197       | 43.0% |
|              | 183 - 185 - 193 - 197 - 199 | 5.0 %- 1.0 %    | 195 - 213             | 12.0 %- 13.0 %  | 205 | 10.0% |     |        | 207   | 8.0%   | 203   | 3.0%  | 193       | 20.0% |           |       |
|              | 175 - 205 - 213             | < 7.0 %         | 187 - 199             | < 5.0 %         |     |       |     |        |       |        |       |       | 199       | 5.0%  |           |       |
| <b>M7.21</b> |                             |                 | 237                   | 47.0%           | 237 | 31.0% | 237 | 50.0%  | 247   | 72.0%  | 237   | 47.0% | 247       | 90.0% | 237       | 54.0% |
|              | 247                         | 100.0%          | 247                   | 53.0%           | 247 | 69.0% | 247 | 50.0%  | 266   | 28.0%  | 247   | 53.0% | 237 - 266 | 5.0%  | 247       | 46.0% |
| <b>M9.27</b> | 264                         | 59.0%           | 306                   | 32.0%           | 266 | 36.0% | 264 | 59.0%  | 301   | 81.0%  | 301   | 81.0% | 301       | 87.0% | 301       | 57.0% |



|             |       |      |      |       |       |      |      |       |      |         |       |       |         |         |       |         |         |       |      |         |       |       |         |       |       |
|-------------|-------|------|------|-------|-------|------|------|-------|------|---------|-------|-------|---------|---------|-------|---------|---------|-------|------|---------|-------|-------|---------|-------|-------|
| <b>M2.5</b> | 215 - | 32.1 |      | 215 - | 32.1  |      | 215- | 46.7  |      | 215-215 | 0.5%  | 20.7  |         | 225-225 | 100%  | 0.0%    | 219-221 | 94.4  | 94.4 | 225-225 | 56.7  |       | 219 -   | 56.7  |       |
|             | 221   | %    | 56.7 | 215   | %     | 33.3 | 215  | %     | 17.2 |         |       |       |         |         |       |         |         |       |      |         | 36.7  | 221   | %       | 64.3  |       |
|             | 219 - | 25.0 | %    | 221 - | 25.0  | %    | 221- | 33.3  | %    | 215-221 | 20.0  | %     |         |         |       |         |         |       |      |         | 16.7  | %     | 219 -   | 23.3  | %     |
|             | 219   | %    |      | 221   | %     |      | 221  | %     |      |         |       |       |         |         |       |         |         |       |      |         |       | 219   | %       |       |       |
| <b>M5.1</b> | 257 - | 26.7 |      | 225 - | 21.4  |      |      |       |      |         |       |       |         |         |       |         | 255-271 | 33.3  |      | 271-271 | 53.3  |       |         |       |       |
|             | 257   | %    |      | 215   | %     |      |      |       |      |         |       |       |         |         |       |         |         |       |      |         |       |       |         |       |       |
|             | 271 - | 26.7 | 40.0 | 271 - | 90.0  | 3.3% | 271- | 100.0 | 0.0% | 271-271 | 100   | 0.0%  | 271-271 | 100%    | 0.0%  | 271-271 | 50.0    | 44.4  |      | 265-265 | 20.0  | 17.2  | 271-271 | 100.0 | 0.0%  |
| <b>5</b>    | 271   | %    | %    | 271   | %     |      | 271  | 0%    |      |         |       |       |         |         |       |         |         |       |      |         |       |       |         |       |       |
|             | 259 - | 6.7% |      | 273 - | 6.7%  |      |      |       |      |         |       |       |         |         |       |         |         |       |      |         | 10.0  |       |         |       |       |
|             | 271   |      |      | 273   |       |      |      |       |      |         |       |       |         |         |       |         |         |       |      |         | %     |       |         |       |       |
| <b>M4.1</b> | 187 - | 46.7 |      | 187 - | 53.3  |      |      |       |      |         |       |       |         | 185-185 | 61.11 |         | 185-185 | 27.8  |      | 191 -   | 40.0  |       | 185 -   | 76.7  |       |
|             | 187   | %    | 23.3 | 187   | %     | 40.0 | 185- | 96.7  | 3.3% | 185-187 | 73.3  | 73.3  |         |         |       |         |         |       |      | 191     | %     | 33.3  | 185     | %     | 3.5%  |
|             | 185 - | 16.7 | %    | 185 - | 16.7  | %    | 185  | %     |      |         |       |       |         | 191-191 | 33.33 | 0.0%    | 187-191 | 33.3  | %    | 185 -   | 26.7  | %     | 183 -   | 13.3  |       |
| <b>1a</b>   | 185   | %    |      | 185   | %     |      |      |       |      |         |       |       |         |         |       |         |         |       |      | 185     | %     |       | 183     | %     |       |
| <b>M1.1</b> | 253 - | 63.3 |      | 255 - | 82.8  |      |      |       |      | 247-247 | 20.0  |       |         |         |       |         |         |       |      | 253 -   | 40.0  |       | 253 -   | 40.0  |       |
|             | 253   | %    | 53.3 | 255   | %     | 60.0 | 255- | 100.0 | 0.0% |         |       | 40.0  |         |         |       |         |         |       |      | 253     | %     | 33.3  | 255     | %     | 42.9  |
|             | 255 - | 23.3 | %    | 253 - | 13.8  | %    | 255- | 0%    |      | 247-255 | 20.0  |       | 253-255 | 100%    | 0%    | 253-255 | 77.8    | 82.4  |      | 253 -   | 33.3  | %     | 253 -   | 36.7  | %     |
|             | 255   | %    |      | 253   | %     |      |      |       |      |         |       |       |         |         |       |         |         |       |      | 255     | %     |       | 253     | %     |       |
| <b>M9.2</b> | 130 - | 66.7 |      | 130 - | 63.0  |      |      |       |      | 140-140 | 43.3  |       |         | 130-140 | 61.11 |         |         |       |      | 130 -   | 66.7  |       | 130 -   | 46.7  |       |
|             | 130   | %    | 33.3 | 130   | %     | 26.7 | 140- | 60.0  | 60.0 |         |       | 56.7  |         |         |       |         |         |       |      | 140     | %     | 80.0  | 140     | %     | 69.0  |
|             | 132 - | 10.0 | %    | 130 - | 18.5  | %    | 162  | %     |      | 140-162 | 56.7  | %     | 128-140 | 38.89   | 0%    | 130-140 | 66.7    | 88.9  |      | 140 -   | 23.3  | %     | 132 -   | 20.0  | %     |
| <b>6</b>    | 132   | %    |      | 162   | %     |      |      |       |      |         |       |       |         |         |       |         |         |       |      | 140     | %     |       | 144     | %     |       |
| <b>M4.1</b> | 273 - | 26.7 |      | 247 - | 33.3  |      |      |       |      |         |       |       |         |         |       |         |         |       |      | 249 -   | 20.0  |       | 261 -   | 40.0  |       |
|             | 286   | %    |      | 247   | %     |      |      |       |      |         |       |       |         |         |       |         |         |       |      |         | 265   | %     | 265     | %     |       |
|             | 286 - | 26.7 | 13.3 | 247 - | 13.3  | 3.5% | 247- | 60.0  | 62.1 | 247-247 | 100.0 | 0.0%  | 249-265 | 88.89   | 88.9  | 261-265 | 88.9    | 94.4  |      | 265 -   | 13.3  | 76.7  | 261 -   | 26.7  | 44.8  |
| <b>0a</b>   | 286   | %    | %    | 265   | %     |      | 265  | %     |      |         |       |       |         |         |       |         |         |       |      | 265     | %     | %     | 261     | %     | %     |
|             | 273 - | 6.7% |      | 247 - | 13.3  |      |      |       |      |         |       |       |         |         |       |         |         |       |      | 249 -   | 10.0  |       |         |       |       |
|             | 273   |      |      | 267   |       |      |      |       |      |         |       |       |         |         |       |         |         |       |      | 249     | %     |       |         |       |       |
| <b>M4.1</b> | 199 - | 60.0 |      | 199 - | 86.7  |      |      |       |      |         |       |       |         |         |       |         |         |       |      | 199-203 | 100.0 | 100.0 | 199-203 | 100.0 | 100.0 |
|             | 203   | %    | 93.3 | 203   | %     | 90.0 | 199- | 96.7  | 96.7 | 199-203 | 100.0 | 100.0 |         |         |       |         |         |       |      |         |       |       |         |       |       |
|             | 196 - | 33.3 | %    | 199 - | 6.7%  |      | 203  | %     |      |         |       |       | 199-203 | 100%    | 100.0 | 199-203 | 100.0   | 100.0 |      | 199-203 | 100.0 | 100.0 | 199-203 | 100.0 | 100.0 |
| <b>1b</b>   | 199   | %    |      | 199   |       |      |      |       |      |         |       |       |         |         |       |         |         |       |      |         |       |       |         |       |       |
| <b>M5.1</b> | 219 - | 56.7 |      |       |       |      |      |       |      |         |       |       |         |         |       |         |         |       |      |         |       |       |         | 100.0 |       |
|             | 219   | %    | 20.7 | 219 - | 100.0 | 0.0% | 219- | 100.0 | 0.0% | 219-219 | 100.0 | 0.0%  | 219-219 | 100%    | 0.0%  | 219-219 | 100.0   | 0.0%  |      | 219-219 | 96.7  | 3.3%  | 219-219 | %     | 0.0%  |
|             | 217 - | 20.0 | %    | 219   | 0%    |      | 219  | 0%    |      |         |       |       |         |         |       |         |         |       |      |         |       |       |         |       |       |
| <b>4</b>    | 219   | %    |      |       |       |      |      |       |      |         |       |       |         |         |       |         |         |       |      |         |       |       |         |       |       |
| <b>M5.1</b> | 243 - | 28.0 |      | 243 - | 60.0  |      |      |       |      |         |       |       |         |         |       |         |         |       |      | 243 -   | 30.0  |       | 247 -   | 53.3  |       |
|             | 247   | %    |      | 245   | %     |      |      |       |      |         |       |       |         |         |       |         |         |       |      |         | 245   | %     | 247     | %     |       |
|             | 243 - | 28.0 | 63.3 | 245 - | 26.7  | 60.0 | 243- | 90.0  | 90.0 | 243-243 | 100.0 | 0.0%  | 245-247 | 100.0   | 0%    | 245-247 | 94.4    | 94.4  |      | 245 -   | 26.7  | 79.3  | 249 -   | 26.7  | 56.7  |
| <b>3</b>    | 245   | %    | %    | 245   | %     |      | 245  | %     |      |         |       |       |         |         |       |         |         |       |      | 247     | %     | %     | 249     | %     | %     |
|             | 243 - | 20.0 |      | 243 - | 13.3  |      |      |       |      |         |       |       |         |         |       |         |         |       |      | 245 -   | 20.0  |       | 245 -   | 16.7  |       |
|             | 243   | %    |      | 243   | %     |      |      |       |      |         |       |       |         |         |       |         |         |       |      | 245     | %     |       | 245     | %     |       |
| <b>M6.1</b> | 238 - | 43.3 |      | 268 - | 33.3  |      |      |       |      |         |       |       |         |         |       |         |         |       |      | 238 -   | 46.7  |       |         |       |       |
|             | 238   | %    | 27.6 | 268   | %     | 50.0 | 268- | 30.0  | 21.4 | 268-268 | 43.3  | 31.8  | 238-268 | 94.44   | 94.4  | 238-238 | 77.8    | 17.7  |      | 238     | %     | 20.7  | 238-238 | 63.3  | 31.0  |
|             | 246 - | 20.0 | %    | 238 - | 16.7  | %    | 268  | %     |      |         |       |       |         |         |       |         |         |       |      |         | 268 - | 20.0  | %       |       |       |
| <b>6</b>    | 246   | %    |      | 268   | %     |      |      |       |      |         |       |       |         |         |       |         |         |       |      | 268     | %     |       |         |       |       |



|             |                       |                   |           |                       |                        |           |             |           |            |         |            |            |         |             |            |         |              |            |              |           |           |                          |                                     |           |
|-------------|-----------------------|-------------------|-----------|-----------------------|------------------------|-----------|-------------|-----------|------------|---------|------------|------------|---------|-------------|------------|---------|--------------|------------|--------------|-----------|-----------|--------------------------|-------------------------------------|-----------|
|             | 238 -<br>246          | 6.7%              |           | 266 -<br>266          | 16.7<br>%              |           |             |           |            |         |            |            |         |             |            |         | 238 -<br>268 | 16.7<br>%  |              |           |           |                          |                                     |           |
| <b>M7.1</b> | 195 -<br>203          | 73.3<br>%         | 73.3<br>% | 195 -<br>203          | 73.3<br>%              | 90.0<br>% | 195-<br>203 | 53.3<br>% | 58.6<br>%  | 195     | 100.<br>0% | 0.0%       | 195-203 | 66.67<br>%  | 94.4<br>%  | 195-199 | 94.4<br>%    | 94.4<br>%  | 193 -<br>203 | 86.7<br>% | 96.7<br>% | 195 -199<br>195 -<br>195 | 43.3<br>%<br>30.0<br>%              | 46.7<br>% |
| <b>M3.8</b> | 181 -<br>169 -<br>181 | 90.5<br>4.8%<br>% | 36.7<br>% | 178 -<br>171 -<br>171 | 30.0<br>10.0<br>%      | 53.3<br>% | 169-<br>169 | 86.7<br>% | 13.3<br>%  | 169-169 | 93.3<br>%  | 3.5%       | 181-181 | 100.0<br>0% | 0.0%       | 181-185 | 61.1<br>%    | 88.9<br>%  | 181 -<br>181 | 76.7<br>% | 17.2<br>% | 181 -<br>185 -<br>185    | 30.0<br>%<br>16.7<br>%<br>16.7<br>% | 44.8<br>% |
| <b>M4.1</b> | 224 -<br>224          | 36.7<br>%         | 10.0<br>% | 226 -<br>234          | 13.3<br>%              | 60.0<br>% | 226-<br>226 | 73.3<br>% | 26.7<br>%  | 226-234 | 30.0<br>%  | 56.7<br>%  | 228-228 | 100%        | 0.0%       | 224-224 | 77.8<br>%    | 16.7<br>%  | 228 -<br>228 | 46.7<br>% | 24.0<br>% | 224 -<br>224             | 78.6<br>%<br>10.7<br>%              |           |
| <b>M6.1</b> | 254 -<br>264          | 42.3<br>%         | 15.4<br>% | 264 -<br>286          | 32.0<br>24.0<br>%      | 12.0<br>% | 264-<br>264 | 63.3<br>% | 5.0%       | 266-266 | 20.0<br>%  |            | 298-304 | 22.22<br>%  |            | 264-264 | 38.9<br>%    | 12.5<br>%  | 264 -<br>304 | 36.7<br>% | 16.7<br>% | 264 -<br>304             | 37.5<br>%<br>37.5<br>%              | 12.5<br>% |
| <b>M1.2</b> | 201 -<br>201          | 32.1<br>%         | 44.8<br>% | 211 -<br>211          | 44.8<br>%              |           | 206-<br>210 | 43.3<br>% |            | 210-210 | 76.7<br>%  | 17.9<br>%  | 201-213 | 83.33<br>%  | 88.9<br>%  | 195-201 | 72.2<br>%    | 72.2<br>%  | 201 -<br>213 | 40.0<br>% | 56.7<br>% | 201 -<br>201             | 60.0<br>%<br>40.0<br>%              | 40.0<br>% |
| <b>M1.3</b> | 244 -<br>244          | 53.3<br>%         | 46.7<br>% | 244 -<br>232 -<br>250 | 20.7<br>20.7<br>%      | 44.8<br>% | 232-<br>244 | 33.3<br>% |            | 244-244 | 33.3<br>%  |            | 244-250 | 100%        | 100.<br>0% | 242-244 | 94.4<br>%    | 94.4<br>%  | 244 -<br>244 | 40.0<br>% | 53.3<br>% | 242 -<br>244             | 36.7<br>%<br>33.3<br>%              | 30.0<br>% |
| <b>M9.2</b> | 177 -<br>177          | 40.0<br>%         | 66.7<br>% | 177 -<br>183          | 93.3<br>%              |           | 177-<br>195 | 56.7<br>% | 89.7<br>%  | 177-177 | 50.0<br>%  |            | 177-183 | 43.3<br>%   | 46.7<br>%  | 169-183 | 94.4<br>%    | 100.<br>0% | 175 -177     | 66.7<br>% | 22.2<br>% | 175 -<br>175             | 53.3<br>%<br>26.7<br>%              | 53.3<br>% |
| <b>M8.2</b> | 231 -<br>221          | 37.5<br>%         | 29.2<br>% | 169 -<br>169 -<br>183 | 65.5<br>%<br>24.1<br>% | 34.5<br>% | 221-<br>221 | 66.7<br>% | 17.2<br>%  | 221-229 | 100<br>%   | 100.<br>0% | 229-229 | 94.4<br>%   | 5.6%       | 229-247 | 88.9<br>%    | 94.4<br>%  | 229 -<br>229 | 73.3<br>% | 26.7<br>% | 229 -<br>229             | 72.4<br>%<br>24.1<br>%              | 75.9<br>% |
| <b>M2.6</b> | 187 -<br>187          | 20.0<br>%         | 63.3<br>% | 193 -<br>197          | 13.3<br>%              | 73.3<br>% | 187-<br>193 | 76.7<br>% | 100.<br>0% | 193-205 | 100.<br>0% | 100.<br>0% | 193-197 | 77.8<br>%   | 94.4<br>%  | 197-201 | 88.9<br>%    | 94.4<br>%  | 193 -<br>207 | 40.0<br>% | 73.3<br>% | 197 -<br>201             | 53.3<br>%<br>53.3<br>%              | 53.3<br>% |

|                         |              |             |           |              |             |           |             |             |           |         |             |             |         |           |             |         |           |             |              |           |           |              |              |           |
|-------------------------|--------------|-------------|-----------|--------------|-------------|-----------|-------------|-------------|-----------|---------|-------------|-------------|---------|-----------|-------------|---------|-----------|-------------|--------------|-----------|-----------|--------------|--------------|-----------|
|                         | 187 -<br>213 | 10.0<br>%   |           | 193 -<br>205 | 13.3<br>%   |           |             |             |           |         |             |             |         |           |             |         |           |             | 197 -<br>207 | 23.3<br>% |           | 201 -<br>201 | 30.0<br>%    |           |
|                         | 187 -<br>211 | 10.0<br>%   |           | 193 -<br>213 | 13.3<br>%   |           |             |             |           |         |             |             |         |           |             |         |           |             | 197 -<br>197 | 20.0<br>% |           | 197 -<br>197 | 16.7<br>%    |           |
|                         |              |             |           | 237 -<br>247 | 37.9<br>%   |           |             |             |           |         |             |             |         |           |             |         |           |             | 247 -<br>247 | 80.0<br>% |           | 237 -<br>247 | 40.0<br>%    |           |
| <b>M7.2</b><br><b>1</b> | 247 -<br>247 | 100.0<br>0% | 0.0<br>%  | 247 -<br>247 | 34.5<br>%   | 37.9<br>% | 237-<br>247 | 60.0<br>%   | 62.1<br>% | 237-247 | 100.0<br>0% | 100.0<br>0% | 247-266 | 55.6<br>% | 55.6<br>%   | 237-247 | 94.4<br>% | 94.4<br>%   | 247 -<br>266 | 10.0<br>% | 20.0<br>% | 237 -<br>237 | 33.3<br>%    | 43.3<br>% |
|                         |              |             |           | 237 -<br>237 | 27.6<br>%   |           |             |             |           |         |             |             |         |           |             |         |           |             | 247 -<br>247 |           |           | 247 -<br>247 | 23.3<br>%    |           |
|                         | 266 -<br>278 | 16.7<br>%   |           | 264 -<br>266 | 31.0<br>%   |           |             |             |           | 264-303 | 33.3<br>%   |             |         |           |             | 301-301 | 61.1<br>% |             |              |           |           | 301 -<br>303 | 43.3<br>%    |           |
| <b>M9.2</b><br><b>7</b> | 266 -<br>306 | 10.0<br>%   | 80.0<br>% | 264 -<br>264 | 27.6<br>%   | 58.6<br>% | 266-<br>301 | 30.0<br>%   | 92.9<br>% | 264-301 | 26.7<br>%   | 72.4<br>%   | 301-301 | 72.2<br>% | 16.7<br>%   | 301-303 | 38.9<br>% | 38.9<br>%   | 301 -<br>301 | 73.3<br>% | 26.7<br>% | 301 -<br>301 | 33.3<br>%    | 44.8<br>% |
|                         | 278 -<br>306 | 10.0<br>%   |           | 266 -<br>266 | 13.8<br>%   |           |             |             |           |         |             |             |         |           |             |         |           |             |              |           |           | 303 -<br>303 | 20.0<br>%    |           |
| <b>M7.2</b>             | 174 -<br>184 | 26.1<br>%   | 37.5<br>% | 167 -<br>167 | 100.0<br>0% | 0.0%      | 132-<br>167 | 70.0<br>%   | 70.0<br>% | 132-167 | 66.7<br>%   | 70.0<br>%   | 132-175 | 83.3<br>% | 83.3<br>%   | 132-175 | 94.4<br>% | 100.0<br>0% | 132 -<br>175 | 66.7<br>% | 80.0<br>% | 132 -<br>175 | 7333.3<br>3% | 73.3<br>% |
|                         | 167 -<br>167 | 21.7<br>%   |           |              |             |           |             |             |           |         |             |             |         |           |             |         |           |             | 132 -<br>132 | 20.0<br>% |           | 132 -<br>132 | 2666.7<br>7% |           |
|                         | 242 -<br>268 | 22.2<br>%   |           | 242 -<br>242 | 60.0<br>%   |           |             |             |           |         |             |             |         |           |             | 269-273 | 38.9<br>% |             | 242 -<br>267 | 40.0<br>% |           | 269 -<br>273 | 4000.0<br>0% |           |
| <b>M8.2</b><br><b>4</b> | 250 -<br>268 | 18.5<br>%   | 70.4<br>% | 252 -<br>270 | 13.3<br>%   | 26.7<br>% | 242-<br>242 | 70.0<br>%   | 27.6<br>% | 250-267 | 60.0<br>%   | 100.0<br>0% | 242-267 | 94.4<br>% | 100.0<br>0% | 267-273 | 27.8<br>% | 83.3<br>%   | 242 -<br>242 | 26.7<br>% | 60.0<br>% | 269 -<br>269 | 2666.7<br>7% | 48.3<br>% |
|                         | 242 -<br>270 | 11.1<br>%   |           | 252 -<br>252 | 10.0<br>%   |           |             |             |           |         |             |             |         |           |             |         |           |             |              |           |           | 273 -<br>273 | 2333.3<br>3% |           |
| <b>M6.1</b><br><b>8</b> | 173 -<br>173 | 10.7<br>%   | 51.7<br>% | 187 -<br>187 | 73.3<br>%   | 3.7%      | 187-<br>187 | 100.0<br>0% | 0.0%      | 187-191 | 60.0<br>%   | 100.0<br>0% | 191-191 | 94.4<br>% | 5.6%        | 183-187 | 44.4<br>% | 56.3<br>%   | 191 -<br>191 | 63.3<br>% | 34.5<br>% | 187-187      | 4000.0<br>0% | 21.4<br>% |
|                         | 175 -<br>175 | 10.7<br>%   |           | 181 -<br>181 | 3.3%        |           |             |             |           |         |             |             |         |           |             | 191-191 | 33.3<br>% |             | 187 -<br>191 | 16.7<br>% |           | 183-183      | 3333.3<br>0% |           |
| <b>M3.9</b>             | 223 -<br>239 | 20.0<br>%   | 70.0<br>% | 223 -<br>239 | 73.3<br>%   | 86.7<br>% | 223-<br>225 | 96.7<br>%   | 96.7<br>% | 225-239 | 100.0<br>0% | 100.0<br>0% | 223-239 | 72.2<br>% | 100.0<br>0% | 221-239 | 55.6<br>% | 94.4<br>%   | 223 -<br>223 | 40.0<br>% | 56.7<br>% | 221-233      | 5333.3<br>0% | 56.7<br>% |
|                         | 239 -<br>239 | 16.7<br>%   |           | 225 -<br>225 | 6.7%        |           |             |             |           |         |             |             |         |           |             | 233-239 | 38.9<br>% |             | 221 -<br>239 | 40.0<br>% |           | 233-233      | 2333.3<br>0% |           |

**Table S5.** The mean degree of expected and observed heterozygosity ( $H_e \pm \text{Std.Dev.}$  and  $H_o \pm \text{Std.Dev.}$ ) for each ID: F1 hybrids, F2 progenies and OPs, singularly and by category (\*).

| <b>ID</b> | <b>He %</b>   | <b>Ho %</b>    |
|-----------|---------------|----------------|
| OP-1      | 57 $\pm$ 0.04 | 43 $\pm$ 9.73  |
| OP-2      | 49 $\pm$ 0.05 | 40 $\pm$ 8.29  |
| F1-A      | 29 $\pm$ 0.40 | 39 $\pm$ 6.59  |
| F1-B      | 35 $\pm$ 0.05 | 49 $\pm$ 5.23  |
| F1-C      | 36 $\pm$ 0.05 | 53 $\pm$ 4.2   |
| F1-D      | 45 $\pm$ 0.04 | 67 $\pm$ 11.9  |
| F2-C      | 45 $\pm$ 0.03 | 46 $\pm$ 8.48  |
| F2-D      | 42 $\pm$ 0.04 | 40 $\pm$ 10.19 |
| F1 *      | 36 $\pm$ 6.42 | 52 $\pm$ 11.56 |
| F2 *      | 44 $\pm$ 2.18 | 43 $\pm$ 4.35  |
| OP *      | 53 $\pm$ 5.91 | 42 $\pm$ 1.75  |



**Table S7.** SSR primer tail and dye. List of the primer tails used with their sequence and corresponding dye.

| <b>Universal Primer</b> | <b>Sequence 5'–3'</b> | <b>Dye</b> |
|-------------------------|-----------------------|------------|
| M13                     | TTGTAACGACGGCCAGT     | 6-FAM      |
| PAN1                    | GAGGTAGTTATTGTGGAGGAC | VIC        |
| PAN2                    | GGAATTAACCGCTCACTAAAG | NED        |
| PAN3                    | TGTAGAAAGACGAAGGGAAGG | PET        |
